# Supplementary material for: Blood Serum Stimulates the Virulence Potential of Mucorales through Enhancement in Mitochondrial Oxidative Metabolism and Rhizoferrin Production
Source: J Fungi (Basel). 2023 Nov 22;9(12):1127. doi: 10.3390/jof9121127 (PMC10744254; doi:10.3390/jof9121127)
Supplement: Supplementary file 1 [file jof-09-01127-s001.zip › jof-2667981-supplementary.pdf]

**Table S1. Strains used in this study**

| Strain                                | Genotype                                                                           | Parental strain                      | Source                                                             |
|---------------------------------------|------------------------------------------------------------------------------------|--------------------------------------|--------------------------------------------------------------------|
| NRRL3631<br>(avirulent control)       | WT                                                                                 | <i>M. lusitanicus</i> (+)            |                                                                    |
| R7B (virulent control)                | WT, ( <i>leuA</i> <sup>-</sup> )                                                   | <i>M. lusitanicus</i> CBS 277.49 (-) | (19)                                                               |
| MU636                                 | WT, ( <i>leuA</i> <sup>-</sup> , <i>pyrG</i> <sup>+</sup> )                        | MU402                                | (20)                                                               |
| M5                                    | ( <i>leuA</i> <sup>-</sup> , <i>adh1</i> <sup>-</sup> )                            | R7B                                  | (12)                                                               |
| $\Delta$ <i>arl2</i>                  | ( <i>leuA</i> <sup>-</sup> , <i>pyrG</i> <sup>+</sup> , <i>arl2</i> <sup>-</sup> ) | MU402                                | (15)                                                               |
| $\Delta$ <i>rfs</i>                   | ( <i>leuA</i> <sup>-</sup> , <i>pyrG</i> <sup>+</sup> , <i>rfs</i> <sup>-</sup> )  | MU402                                | (13)                                                               |
| <i>Rhizopus arrhizus</i> (RA12)       | WT                                                                                 |                                      | Clinical isolated kindly provided by Dr. Urlike Binder             |
| <i>Mucor circinelloides</i> (MC39)    | WT                                                                                 |                                      | Clinical isolated kindly provided by Dr. Urlike Binder             |
| <i>Mucor racemosus</i> (MR11)         | WT                                                                                 |                                      | Clinical isolated kindly provided by Dr. Urlike Binder             |
| <i>Lichtheimia corymbifera</i> (LC42) | WT                                                                                 |                                      | Clinical isolated kindly provided by Dr. Urlike Binder             |
| <i>Candida albicans</i>               | WT                                                                                 |                                      | Clinical isolated from Hospital Civil, Morelia, Michoacán, México. |

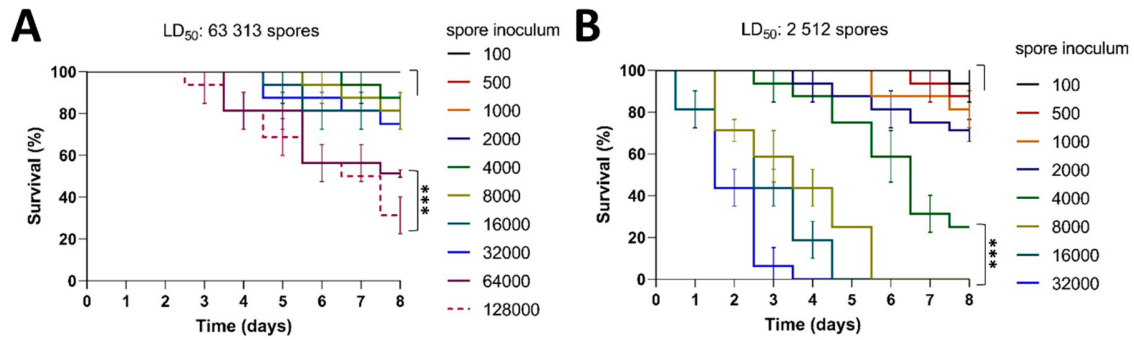

**Figure S1. Effect of the inoculum size of *M. lusitanicus* and *R. arrhizus* on the survival of *G. mellonella*.** Spores from **A**) *M. lusitanicus* (MU636) and **B**) *R. arrhizus* (RA12) were used to infect *G. mellonella*. After the larvae were infected with the spores, the survival was monitored daily for a period of 8 days. The lethal dose 50 (LD<sub>50</sub>) was calculated. Data were statistically analyzed using the Mantel-Cox test \*\*\*,  $P < 0.01$ . The results presented are the average values obtained from four independent experiments.

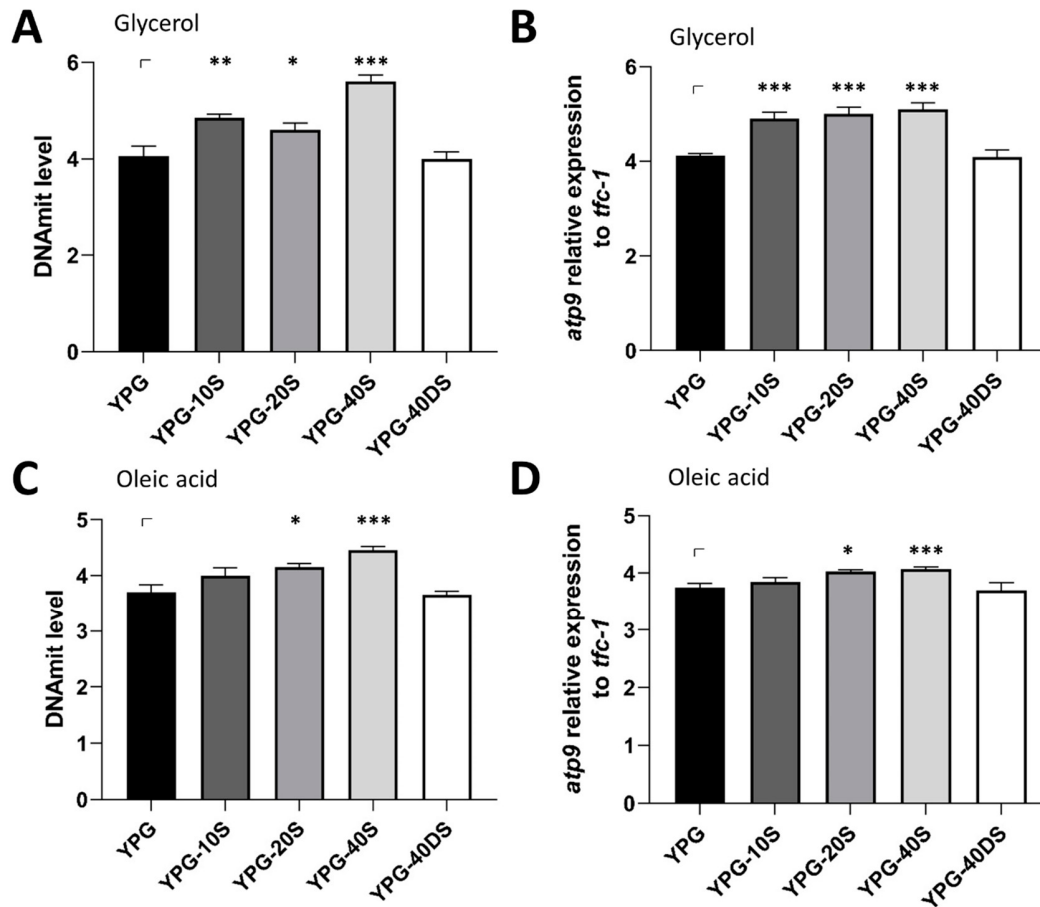

**Figure S2. Effect of blood serum on the mitochondrial content during aerobic germination of *M. lusitanicus* in non-fermentable carbon sources.** Spores from the R7B strain produced on YPG supplemented or not with 10% (YPG-10S), 20% (YPG-20S), and 40% (YPG-40S) of native blood serum or 40% of denatured blood serum (YPG-40DS) were aerobically germinated for 4 h in YNB supplemented with 111 mM glycerol or 111 mM oleic acid. **A, C)** qPCR analysis using total DNA isolated from mycelium of 4 h was performed to quantify the mitochondrial gene *atp9*. **B, D)** Total ARN from mycelium after 4 h of growth was isolated for quantification of the expression of the molecular marker of mitochondrial activity, *atp9*. The data were statistically analyzed using the ANOVA and Fisher's exact test. \* $P < 0.05$ , \*\* $P < 0.01$ , \*\*\* $P < 0.001$ .

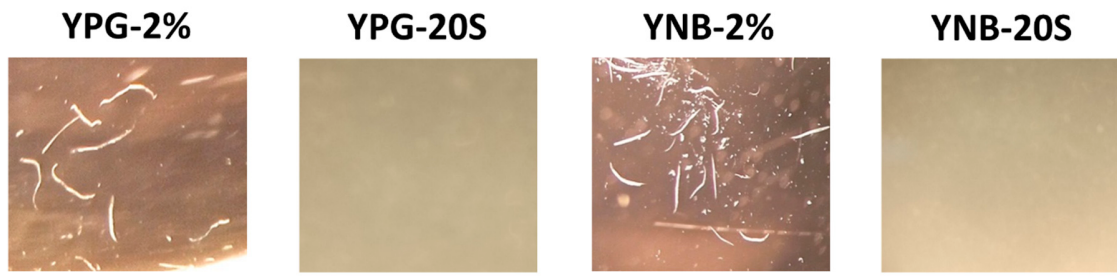

**Figure S3. Effect of the addition of blood serum to culture broth on the observation of the nematodes under the stereoscope.** YPG-2%, YPG-2% supplemented with 20% of blood serum (YPG-20S), YNB-2%, and YNB-2% supplemented with 20% of blood serum (YNB-20S). Photos were taken using 10x optical microscope.

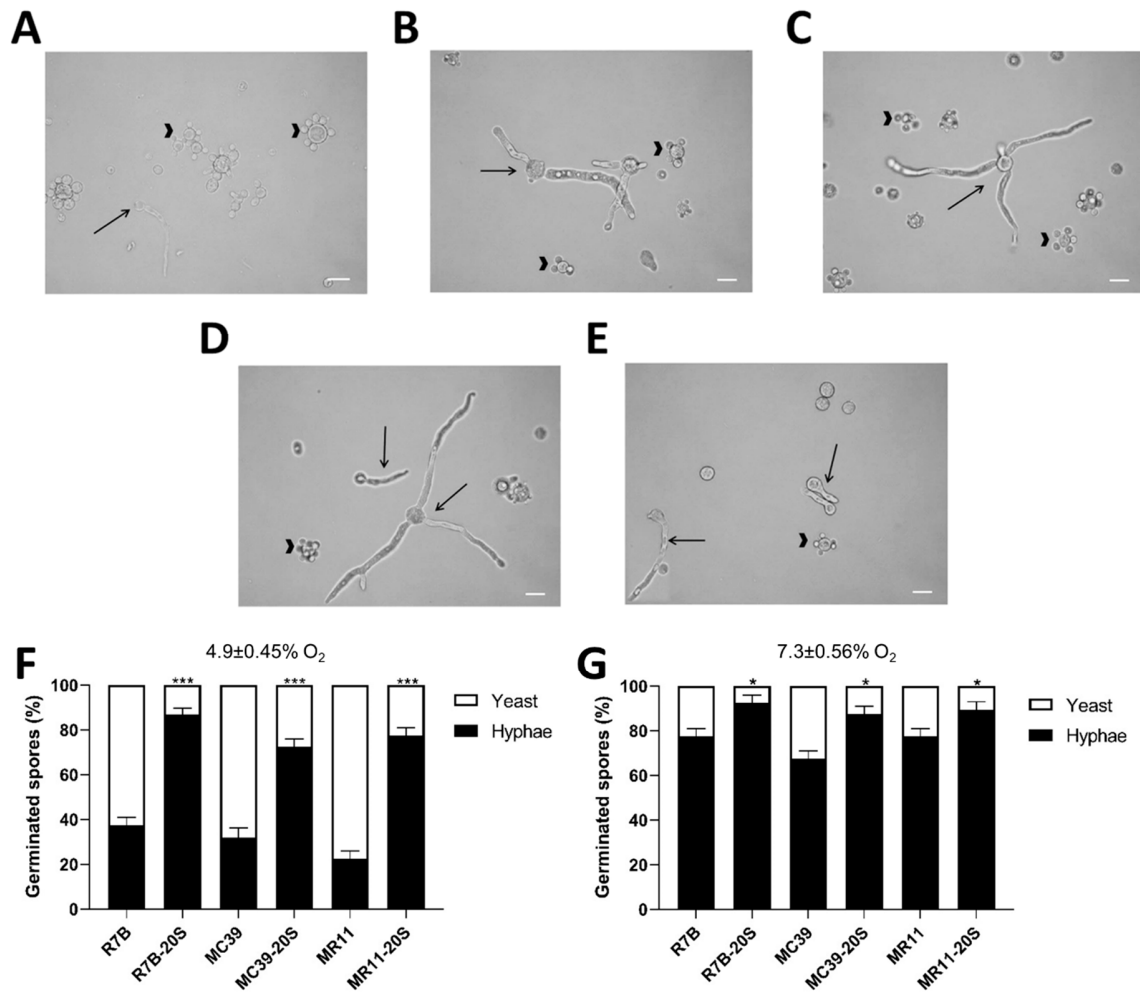

**Figure S4. Effects of blood serum on the germination of *M. lusitanicus* after 6 h of growth under low oxygen levels (LOL).** Representative photographs of the morphology under low oxygen levels of **A)** YPG, **B)** YPG-10S, **C)** YPG-20S, **D)** YPG-40S, and **E)** YPG-40DS (-S, native blood serum. -DS, denatured blood serum). The arrows represent the germings and the arrow head represents the yeast cells. Bar = 20  $\mu$ m. **F, G)** Spores from YPG or YPG supplemented with blood serum (-20S) of *M. lusitanicus* (R7B), *M. circinelloides* (MC39) or *M. racemosus* (MR11) were germinated under low oxygen levels ( $4.9 \pm 0.45\%$  of oxygen;  $7.3 \pm 0.56\%$  of oxygen). The data were statistically analyzed using the ANOVA and Fisher's exact test. \*P < 0.05, \*\*\*P < 0.001.

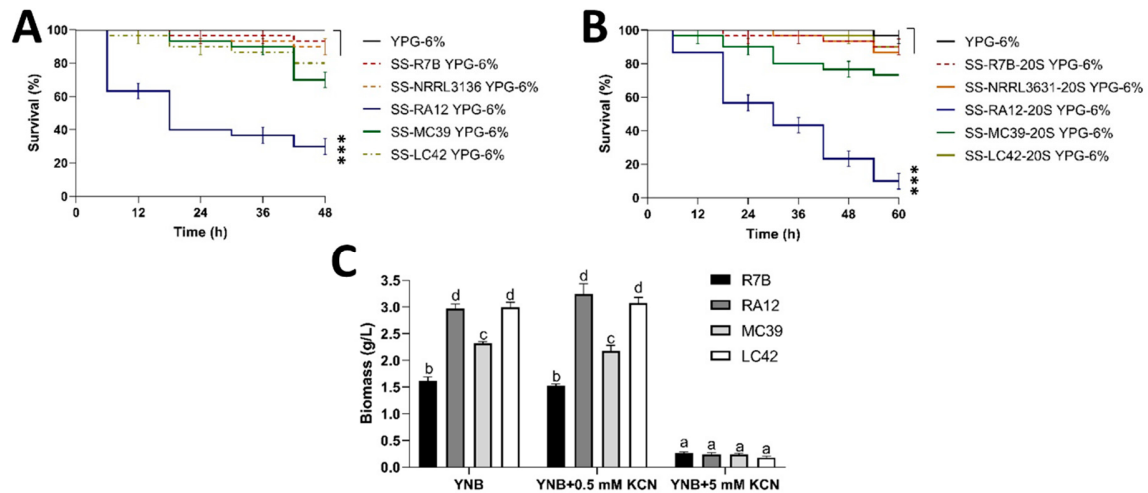

**Figure S5. Effect of the toxicity of the SS from growth cultures of Mucorales under high glucose levels (6%) and KCN.** Spores from *R. arrhizus*, *M. lusitanicus* (R7B and NRRL3136), *M. circinelloides* (MC39), and *L. corymbifera* (LC42) were produced on YPG or YPG supplemented with blood serum (-20S). The spores were grown in liquid YNB with 0.1% of glucose medium supplemented with **A**) 6% glucose (spores from YPG), **B**) 6% glucose (spores from YPG-20S), YPG with **C**) 0.5 mM of KCN in order to obtain their SS after 48 h of growth under aerobic conditions and tested for their toxicity against *C. elegans*. A total of 15–20 nematodes were used per experiment and incubated at 18°C for 60 h. The results presented are the average values obtained from four independent experiments. Survival data were statistically analyzed using the Mantel-Cox test \*\*\*,  $P < 0.01$ . Data were statistically analyzed using ANOVA with Fisher's exact test; the different letters shown statistical significance ( $P < 0.001$ ).

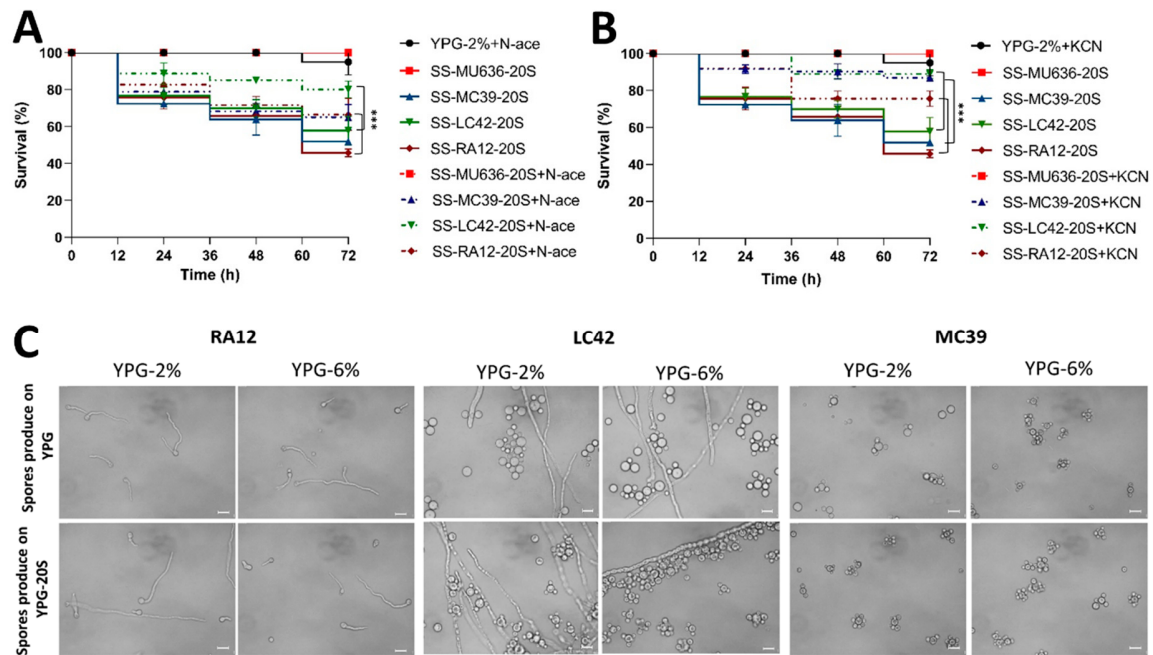

**Figure S6. Effect of blood serum in SS toxicity and morphology during anaerobic germination of clinically relevant Mucorales.** Spores from *R. arrhizus* (RA12), *M. lusitanicus* (MU636), *M. circinelloides* (MC39), and *L. corymbifera* (LC42) produced on YPG-20S were used to obtain their SSs from anaerobic growth in YPG-2% supplemented with **A**) 10 mM N-acetylcysteine (N-ace) and **B**) 0.5 mM KCN and tested for their toxicity against *C. elegans*. A total of 15–20 nematodes were used per experiment and incubated at 18°C for 72 h. **C**) Representative photographs from spores produced on YPG supplemented or not with blood serum of Mucorales germinating under anaerobic growth. The photographs were taken using a 40x optical microscope, bar = 20  $\mu$ m. Survival data were statistically analyzed using the Mantel-Cox test \*\*\*,  $P < 0.01$ . The results presented are the average values obtained from four independent experiments.

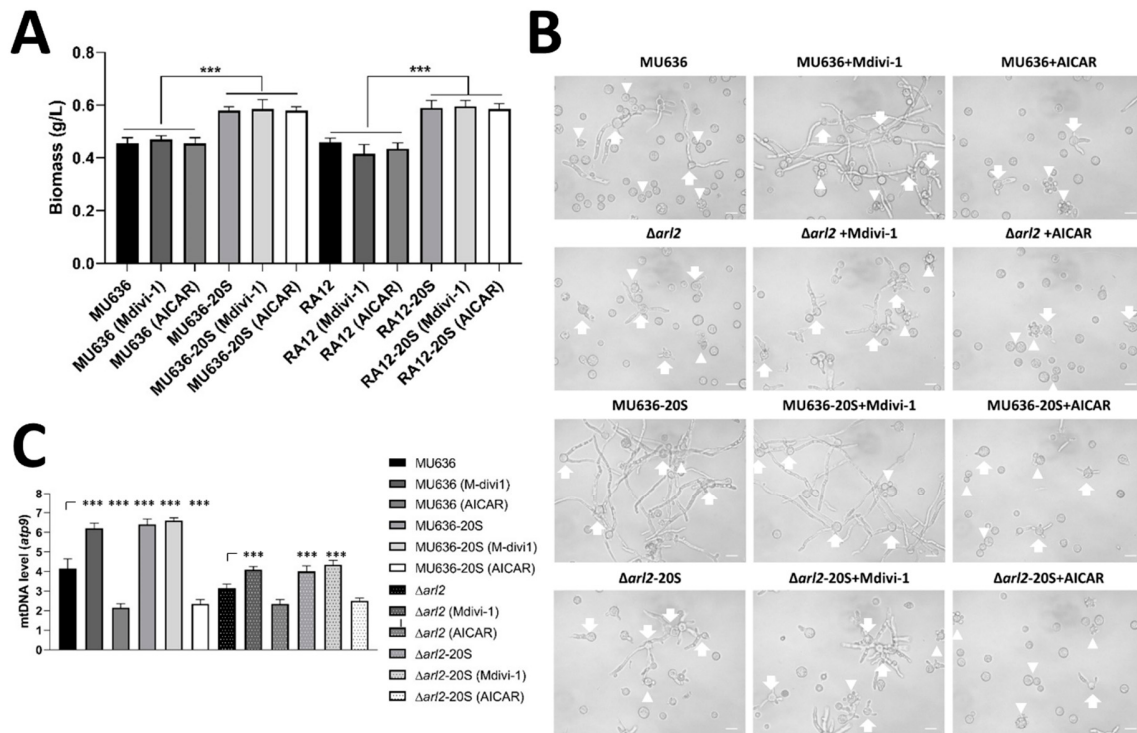

**Figure S7. Effect of inducer AICAR and repressor Mdivi-1 of mitophagy in hyphal stimulation during growth at low oxygen levels in *M. lusitanicus* and *R. arrhizus*.** **A)** Biomass was determined from the growth under aerobic conditions of spores produced in presence (-20S) or absence of blood serum from WT MU636 (*M. circinelloides*) and RA12 (*R. arrhizus*) during 48 h in liquid YNB-0.1% supplemented with 100  $\mu$ M AICAR and 100  $\mu$ M Mdivi-1. **B)** Representative photographs were taken from germinated spores produced in presence (-20S) or absence of blood serum from MU636 and  $\Delta arl2$  strains from *M. lusitanicus* that were grown at low oxygen levels ( $4.9 \pm 0.45\%$  oxygen) during 6 h in liquid YPG-2% supplemented with 100  $\mu$ M AICAR and 100  $\mu$ M Mdivi-1 (scale bar = 20  $\mu$ m). Hyphae are shown in white arrow and yeast in white arrow head. **C)** Total DNA was obtained from germinating spores after 6 h of growth under low oxygen levels from panel B, these germinating spores were used to quantified by qPCR the mitochondrial *atp9* gene using *tfc-1* as a genomic DNA marker. The results presented are the average values obtained from four independent experiments. The data were statistically analyzed using ANOVA and Fisher's exact test. \*\*\*  $P < 0.001$ .

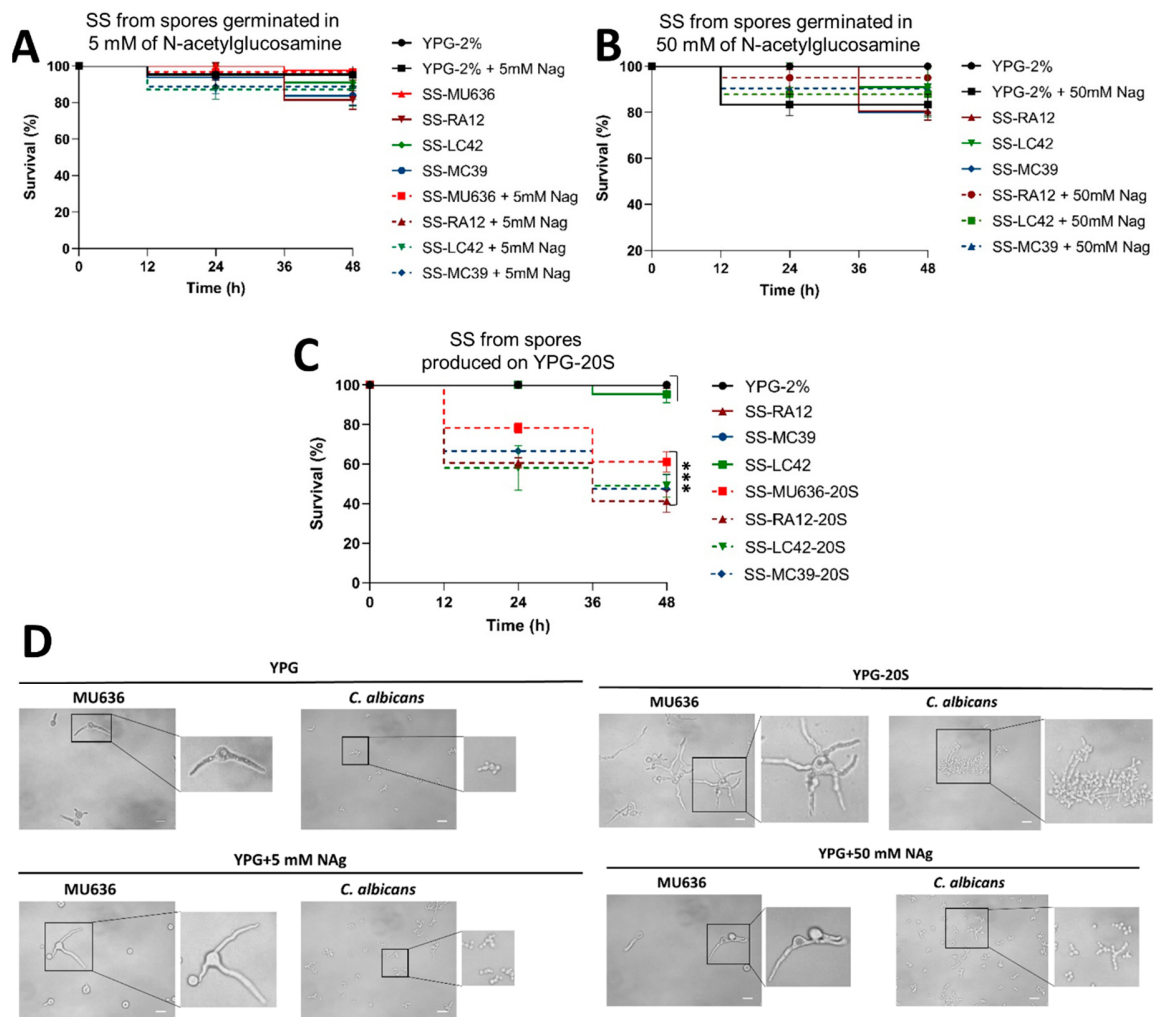

**Figure S8. N-acetylglucosamine did not increase the toxicity of the SS from Mucorales.** SSs obtained after 48 h of aerobic growth from the different Mucorales **A)** from spores that were germinated in YPG supplemented with 5 mM and **B)** 50 mM of N-acetylglucosamine, or **C)** SS obtained from the growth of spores that were produced on YPG supplemented with blood serum (YPG-20S) and assayed against *C. elegans*. A total of 15–20 nematodes were used per experiment and incubated at 18 °C for 48 h. **D)** Spores from MU636 or yeast cells of *C. albicans* germinated aerobically (150 rpm) in YPG in the presence of 5 or 50 mM of N-acetylglucosamine. Representative photographs at 4 h were taken using a 40x optical microscope, bar = 20 µm. Data were statistically analyzed using ANOVA with Fisher's exact test \*\*\*,

$P < 0.001$ . Survival data were statistically analyzed using the Mantel–Cox test; \*\*\*,  $P < 0.01$ . The results presented are the average values obtained from four independent experiments.
